# Supplementary material for: Domain-Specific Phenotypic Profiles in RAF1-Related Noonan Syndrome
Source: Research Square preprint supplement (doi:10.21203/rs.3.rs-7696796/v1), 2025-10-15
Supplement: Supplementary file 1 [file ea3a3c8341087f5e335e5d6a.xlsx]

## Sheet: Literature research summary
PMID	Incluso/eslusco	Title	Authors	Citation	First Author	Journal/Book	Publication Year	Create Date	PMCID	NIHMS ID	DOI
39573843	Incluso	Trametinib alters contractility of paediatric Noonan syndrome-associated hypertrophic myocardial tissue slices	Hamers J, Sen P, Murthi SR, Papanakli L, von Stumm M, Baessato F, Cleuziou J, Meierhofer C, Ewert P, Dendorfer A, Merkus D, Wolf CM.	ESC Heart Fail. 2024 Nov 21. doi: 10.1002/ehf2.15173. Online ahead of print.	Hamers J	ESC Heart Fail	2024	2024-11-22			10.1002/ehf2.15173
38827265	incluso	Treatment of RAF1-Related Obstructive Hypertrophic Cardiomyopathy by MEK Inhibition Using Trametinib	Kiamanesh O, Greenway SC, Dicke F, Ballantyne B, Mitrovic S, McGrath K, White JA, Kent WDT, Andelfinger G.	JACC Case Rep. 2024 May 23;29(13):102379. doi: 10.1016/j.jaccas.2024.102379. eCollection 2024 Jul 3.	Kiamanesh O	JACC Case Rep	2024	2024-06-03	PMC11137563		10.1016/j.jaccas.2024.102379
37905408	incluso	Hypertrophic Cardiomyopathy Secondary to RAF1 Cysteine-Rich Domain Variants	Fullenkamp DE, Jorgensen RM, Leach DF, Sinha A, Salamone IM, Johnston JR, Dellefave-Castillo LM, Choudhury L, McNally EM, Wilsbacher LD.	Circ Genom Precis Med. 2023 Dec;16(6):e004262. doi: 10.1161/CIRCGEN.123.004262. Epub 2023 Oct 31.	Fullenkamp DE	Circ Genom Precis Med	2023	2023-10-31	PMC10841507	NIHMS1938555	10.1161/CIRCGEN.123.004262
37787490	incluso	RAF1 mutation leading to hypertrophic cardiomyopathy in a Chinese family with a history of sudden cardiac death: A diagnostic insight into Noonan syndrome	Zheng J, Peng L, Cheng R, Li Z, Xie J, Huang E, Cheng J, Zhao Q.	Mol Genet Genomic Med. 2024 Jan;12(1):e2290. doi: 10.1002/mgg3.2290. Epub 2023 Oct 3.	Zheng J	Mol Genet Genomic Med	2024	2023-10-03	PMC10767430		10.1002/mgg3.2290
36566191	incluso	New insights on Noonan syndrome's clinical phenotype: a single center retrospective study	Baldo F, Fachin A, Da Re B, Rubinato E, Bobbo M, Barbi E.	BMC Pediatr. 2022 Dec 24;22(1):734. doi: 10.1186/s12887-022-03804-2.	Baldo F	BMC Pediatr	2022	2022-12-24	PMC9789552		10.1186/s12887-022-03804-2
36333975	incluso	A severe clinicopathologic phenotype of RAF1 Ser257Leu neomutation in a preterm infant without cardiac anomaly	Darouich S, Chakroun AS, Bellamine H, Khamassi I.	Am J Med Genet A. 2023 Feb;191(2):630-633. doi: 10.1002/ajmg.a.63035. Epub 2022 Nov 5.	Darouich S	Am J Med Genet A	2023	2022-11-05			10.1002/ajmg.a.63035
36304179	incluso	RASopathy Cohort of Patients Enrolled in a Brazilian Reference Center for Rare Diseases: A Novel Familial LZTR1 Variant and Recurrent Mutations	Chaves Rabelo N, Gomes ME, de Oliveira Moraes I, Cantagalli Pfisterer J, Loss de Morais G, Antunes D, Caffarena ER, Llerena J Jr, Gonzalez S.	Appl Clin Genet. 2022 Oct 21;15:153-170. doi: 10.2147/TACG.S372761. eCollection 2022.	Chaves Rabelo N	Appl Clin Genet	2022	2022-10-28	PMC9595068		10.2147/TACG.S372761
36171012	incluso	Male infant with Noonan syndrome with RAF-1 gene mutation who survived hypertrophic cardiomyopathy-induced fatal heart failure and uncontrollable arrhythmias	Hagino M, Ota C, Onoki T, Iwasawa S.	BMJ Case Rep. 2022 Sep 28;15(9):e250342. doi: 10.1136/bcr-2022-250342.	Hagino M	BMJ Case Rep	2022	2022-09-28	PMC9528629		10.1136/bcr-2022-250342
36155125	incluso	Detailed prenatal and postnatal MRI findings and clinical analysis of RAF1 in Noonan syndrome	Helenius K, Parkkola R, Arola A, Peltola V, Haanpää MK.	Eur J Med Genet. 2022 Nov;65(11):104626. doi: 10.1016/j.ejmg.2022.104626. Epub 2022 Sep 22.	Helenius K	Eur J Med Genet	2022	2022-09-26			10.1016/j.ejmg.2022.104626
36002837	incluso	RASopathies due to de novo pathogenic variants: clinical features, genetic findings and outcomes in nine neonates born with congenital heart defects	Zheng S, Huang H, Ma L, Zhu T.	BMC Med Genomics. 2022 Aug 24;15(1):184. doi: 10.1186/s12920-022-01336-3.	Zheng S	BMC Med Genomics	2022	2022-08-24	PMC9400306		10.1186/s12920-022-01336-3
35953836	incluso	Noonan syndrome with RAF1 gene mutations in a newborn with cerebral haemorrhage	Lan J, Zeng T, Liu S, Lan J, Qian L.	Eur J Med Res. 2022 Aug 11;27(1):146. doi: 10.1186/s40001-022-00772-2.	Lan J	Eur J Med Res	2022	2022-08-11	PMC9367063		10.1186/s40001-022-00772-2
35950157	incluso	RAF-1 Mutation Associated with a Risk for Ventricular Arrhythmias in a Child with Noonan Syndrome and Cardiovascular Pathology	Făgărășan A, Al Hussein H, Ghiragosian Rusu SE.	J Crit Care Med (Targu Mures). 2022 May 12;8(2):126-130. doi: 10.2478/jccm-2022-0007. eCollection 2022 Apr.	Făgărășan A	J Crit Care Med (Targu Mures)	2022	2022-08-11	PMC9097645		10.2478/jccm-2022-0007
35904599	incluso	Molecular and clinical profile of patients referred as Noonan or Noonan-like syndrome in Greece: a cohort of 86 patients	Papadopoulos G, Papadopoulou A, Kosma K, Papadimitriou A, Papaevangelou V, Kanaka-Gantenbein C, Bountouvi E, Kitsiou-Tzeli S.	Eur J Pediatr. 2022 Oct;181(10):3691-3700. doi: 10.1007/s00431-022-04574-w. Epub 2022 Jul 29.	Papadopoulos G	Eur J Pediatr	2022	2022-07-29			10.1007/s00431-022-04574-w
35770001	incluso	Cardiovascular Abnormalities and Gene Mutations in Children With Noonan Syndrome	Sun L, Xie YM, Wang SS, Zhang ZW.	Front Genet. 2022 Jun 13;13:915129. doi: 10.3389/fgene.2022.915129. eCollection 2022.	Sun L	Front Genet	2022	2022-06-30	PMC9234298		10.3389/fgene.2022.915129
35535293	incluso	Progressive Left Ventricular Outflow Tract Stenosis in a Noonan Syndrome Patient With Severe Hypertrophic Cardiomyopathy During Growth Hormone Treatment	Ichikawa Y, Saito N, Kurosawa K, Hanakawa J, Ueda H.	Cureus. 2022 Apr 7;14(4):e23937. doi: 10.7759/cureus.23937. eCollection 2022 Apr.	Ichikawa Y	Cureus	2022	2022-05-10	PMC9079321		10.7759/cureus.23937
35418823	incluso	Comprehensive Genetic Analysis of RASopathy in the Era of Next-Generation Sequencing and Definition of a Novel Likely Pathogenic >KRAS Variation	Demir S, Yaşar Köstek H, Sanrı A, Yıldırım R, Özgüç Çömlek F, Yalçıntepe S, Deveci M, Atlı Eİ, Atlı E, Eker D, Gürkan H, Tütüncüler Kökenli F.	Mol Syndromol. 2022 Feb;13(2):88-98. doi: 10.1159/000520722. Epub 2022 Jan 7.	Demir S	Mol Syndromol	2022	2022-04-14	PMC8928177		10.1159/000520722
34463117	incluso	Molecular Management of Multifocal Atrial Tachycardia in Noonan's Syndrome With MEK1/2 Inhibitor Trametinib	Meisner JK, Bradley DJ, Russell MW.	Circ Genom Precis Med. 2021 Oct;14(5):e003327. doi: 10.1161/CIRCGEN.121.003327. Epub 2021 Aug 31.	Meisner JK	Circ Genom Precis Med	2021	2021-08-31			10.1161/CIRCGEN.121.003327
33686258	incluso	High diagnosis rate for nonimmune hydrops fetalis with prenatal clinical exome from the Hydrops-Yielding Diagnostic Results of Prenatal Sequencing (HYDROPS) Study	Al-Kouatly HB, Makhamreh MM, Rice SM, Smith K, Harman C, Quinn A, Valcarcel BN, Firman B, Liu R, Hegde M, Critchlow E, Berger SI.	Genet Med. 2021 Jul;23(7):1325-1333. doi: 10.1038/s41436-021-01121-0. Epub 2021 Mar 8.	Al-Kouatly HB	Genet Med	2021	2021-03-09			10.1038/s41436-021-01121-0
33568805	incluso	When to test fetuses for RASopathies? Proposition from a systematic analysis of 352 multicenter cases and a postnatal cohort	Scott A, Di Giosaffatte N, Pinna V, Daniele P, Corno S, D'Ambrosio V, Andreucci E, Marozza A, Sirchia F, Tortora G, Mangiameli D, Di Marco C, Romagnoli M, Donati I, Zonta A, Grosso E, Naretto VG, Mastromoro G, Versacci P, Pantaleoni F, Radio FC, Mazza T, Damante G, Papi L, Mattina T, Giancotti A, Pizzuti A, Laberge AM, Tartaglia M, Delrue MA, De Luca A.	Genet Med. 2021 Jun;23(6):1116-1124. doi: 10.1038/s41436-020-01093-7. Epub 2021 Feb 10.	Scott A	Genet Med	2021	2021-02-11			10.1038/s41436-020-01093-7
31259454	incluso	Cardiac transplantation in children with Noonan syndrome	McCallen LM, Ameduri RK, Denfield SW, Dodd DA, Everitt MD, Johnson JN, Lee TM, Lin AE, Lohr JL, May LJ, Pierpont ME, Stevenson DA, Chatfield KC.	Pediatr Transplant. 2019 Sep;23(6):e13535. doi: 10.1111/petr.13535. Epub 2019 Jul 1.	McCallen LM	Pediatr Transplant	2019	2019-07-02			10.1111/petr.13535
31163979	incluso	Inducible Pluripotent Stem Cell-Derived Cardiomyocytes Reveal Aberrant Extracellular Regulated Kinase 5 and Mitogen-Activated Protein Kinase Kinase 1/2 Signaling Concomitantly Promote Hypertrophic Cardiomyopathy in RAF1-Associated Noonan Syndrome	Jaffré F, Miller CL, Schänzer A, Evans T, Roberts AE, Hahn A, Kontaridis MI.	Circulation. 2019 Jul 16;140(3):207-224. doi: 10.1161/CIRCULATIONAHA.118.037227. Epub 2019 Jun 5.	Jaffré F	Circulation	2019	2019-06-06	PMC6709678	NIHMS1531104	10.1161/CIRCULATIONAHA.118.037227
31145547	incluso	RAF1 variant in a patient with Noonan syndrome with multiple lentigines and craniosynostosis	Rodríguez F, Ponce D, Berward FJ, Lopetegui B, Cassorla F, Aracena M.	Am J Med Genet A. 2019 Aug;179(8):1598-1602. doi: 10.1002/ajmg.a.61203. Epub 2019 May 30.	Rodríguez F	Am J Med Genet A	2019	2019-05-31			10.1002/ajmg.a.61203
31030682	incluso	A severe clinical phenotype of Noonan syndrome with neonatal hypertrophic cardiomyopathy in the second case worldwide with RAF1 S259Y neomutation	Jaouadi H, Chehida AB, Kraoua L, Etchevers HC, Argiro L, Kasdallah N, Blibech S, Delague V, Lévy N, Tebib N, Mrad R, Abdelhak S, Benkhalifa R, Zaffran S.	Genet Res (Camb). 2019 Apr 29;101:e6. doi: 10.1017/S0016672319000041.	Jaouadi H	Genet Res (Camb)	2019	2019-04-30	PMC7045029		10.1017/S0016672319000041
30762279	incluso	Prevalence of pathogenic and likely pathogenic variants in the RASopathy genes in patients who have had panel testing for cardiomyopathy	Aljeaid D, Sanchez AI, Wakefield E, Chadwell SE, Moore N, Prada CE, Zhang W.	Am J Med Genet A. 2019 Apr;179(4):608-614. doi: 10.1002/ajmg.a.61072. Epub 2019 Feb 14.	Aljeaid D	Am J Med Genet A	2019	2019-02-15			10.1002/ajmg.a.61072
30732632	incluso	Clinical and mutation profile of pediatric patients with RASopathy-associated hypertrophic cardiomyopathy: results from a Chinese cohort	Chen H, Li X, Liu X, Wang J, Zhang Z, Wu J, Huang M, Guo Y, Li F, Wang X, Fu L.	Orphanet J Rare Dis. 2019 Feb 7;14(1):29. doi: 10.1186/s13023-019-1010-z.	Chen H	Orphanet J Rare Dis	2019	2019-02-09	PMC6367752		10.1186/s13023-019-1010-z
30359267	incluso	Identifying the genetic causes for prenatally diagnosed structural congenital anomalies (SCAs) by whole-exome sequencing (WES)	Leung GKC, Mak CCY, Fung JLF, Wong WHS, Tsang MHY, Yu MHC, Pei SLC, Yeung KS, Mok GTK, Lee CP, Hui APW, Tang MHY, Chan KYK, Liu APY, Yang W, Sham PC, Kan ASY, Chung BHY.	BMC Med Genomics. 2018 Oct 25;11(1):93. doi: 10.1186/s12920-018-0409-z.	Leung GKC	BMC Med Genomics	2018	2018-10-26	PMC6202811		10.1186/s12920-018-0409-z
30157809	incluso	Clinical profile of comorbidity of rare diseases in a Tunisian patient: a case report associating incontinentia pigmenti and Noonan syndrome	Ghedira N, Lagarde A, Ben Ameur K, Elouej S, Sakka R, Kerkeni E, Chioukh FZ, Olschwang S, Desvignes JP, Abdelhak S, Delague V, Lévy N, Monastiri K, De Sandre-Giovannoli A.	BMC Pediatr. 2018 Aug 29;18(1):286. doi: 10.1186/s12887-018-1259-8.	Ghedira N	BMC Pediatr	2018	2018-08-31	PMC6116546		10.1186/s12887-018-1259-8
30055033	incluso	Nonreentrant atrial tachycardia occurs independently of hypertrophic cardiomyopathy in RASopathy patients	Levin MD, Saitta SC, Gripp KW, Wenger TL, Ganesh J, Kalish JM, Epstein MR, Smith R, Czosek RJ, Ware SM, Goldenberg P, Myers A, Chatfield KC, Gillespie MJ, Zackai EH, Lin AE.	Am J Med Genet A. 2018 Aug;176(8):1711-1722. doi: 10.1002/ajmg.a.38854. Epub 2018 Jul 28.	Levin MD	Am J Med Genet A	2018	2018-07-29	PMC6107379	NIHMS984124	10.1002/ajmg.a.38854
29271604	incluso	The novel RAF1 mutation p.(Gly361Ala) located outside the kinase domain of the CR3 region in two patients with Noonan syndrome, including one with a rare brain tumor	Harms FL, Alawi M, Amor DJ, Tan TY, Cuturilo G, Lissewski C, Brinkmann J, Schanze D, Kutsche K, Zenker M.	Am J Med Genet A. 2018 Feb;176(2):470-476. doi: 10.1002/ajmg.a.38569. Epub 2017 Dec 22.	Harms FL	Am J Med Genet A	2018	2017-12-23			10.1002/ajmg.a.38569
29084544	incluso	Targeted/exome sequencing identified mutations in ten Chinese patients diagnosed with Noonan syndrome and related disorders	Xu S, Fan Y, Sun Y, Wang L, Gu X, Yu Y.	BMC Med Genomics. 2017 Oct 30;10(1):62. doi: 10.1186/s12920-017-0298-6.	Xu S	BMC Med Genomics	2017	2017-11-01	PMC5663114		10.1186/s12920-017-0298-6
28777121	incluso	RAF1 variants causing biventricular hypertrophic cardiomyopathy in two preterm infants: further phenotypic delineation and review of literature	Thompson D, Patrick-Esteve J, Surcouf JW, Rivera D, Castellanos B, Desai P, Lilje C, Lacassie Y, Marble M, Zambrano R.	Clin Dysmorphol. 2017 Oct;26(4):195-199. doi: 10.1097/MCD.0000000000000194.	Thompson D	Clin Dysmorphol	2017	2017-08-05			10.1097/MCD.0000000000000194
26467173	incluso	A Novel Mutation on RAF1 in Association with Fetal Findings Suggestive of Noonan Syndrome	Kneitel AW, Norby A, Vettraino I, Treadwell MC.	Fetal Pediatr Pathol. 2015;34(6):361-4. doi: 10.3109/15513815.2015.1087609. Epub 2015 Oct 14.	Kneitel AW	Fetal Pediatr Pathol	2015	2015-10-16			10.3109/15513815.2015.1087609
26266034	incluso	A Novel Noonan Syndrome RAF1 Mutation: Lethal Course in a Preterm Infant	Ratola A, Silva HM, Guedes A, Mota C, Braga AC, Oliveira D, Alegria A, Carvalho C, Álvares S, Proença E.	Pediatr Rep. 2015 Jun 24;7(2):5955. doi: 10.4081/pr.2015.5955. eCollection 2015 May 25.	Ratola A	Pediatr Rep	2015	2015-08-13	PMC4508625		10.4081/pr.2015.5955
25706034	incluso	Neonatal pulmonary arterial hypertension and Noonan syndrome: two fatal cases with a specific RAF1 mutation	Hopper RK, Feinstein JA, Manning MA, Benitz W, Hudgins L.	Am J Med Genet A. 2015 Apr;167A(4):882-5. doi: 10.1002/ajmg.a.37024. Epub 2015 Feb 23.	Hopper RK	Am J Med Genet A	2015	2015-02-24			10.1002/ajmg.a.37024
24775816	incluso	LEOPARD syndrome: a variant of Noonan syndrome strongly associated with hypertrophic cardiomyopathy	Carcavilla A, Santomé JL, Pinto I, Sánchez-Pozo J, Guillén-Navarro E, Martín-Frías M, Lapunzina P, Ezquieta B.	Rev Esp Cardiol (Engl Ed). 2013 May;66(5):350-6. doi: 10.1016/j.rec.2012.09.015. Epub 2013 Jan 11.	Carcavilla A	Rev Esp Cardiol (Engl Ed)	2013	2014-04-30			10.1016/j.rec.2012.09.015
23885229	incluso	Noonan syndrome: comparing mutation-positive with mutation-negative dutch patients	Croonen EA, Nillesen W, Schrander C, Jongmans M, Scheffer H, Noordam C, Draaisma JM, van der Burgt I, Yntema HG.	Mol Syndromol. 2013 Jun;4(5):227-34. doi: 10.1159/000350686. Epub 2013 May 8.	Croonen EA	Mol Syndromol	2013	2013-07-26	PMC3711482		10.1159/000350686
23877478	incluso	Unique cerebrovascular anomalies in Noonan syndrome with RAF1 mutation	Zarate YA, Lichty AW, Champion KJ, Clarkson LK, Holden KR, Matheus MG.	J Child Neurol. 2014 Aug;29(8):NP13-7. doi: 10.1177/0883073813492384. Epub 2013 Jul 21.	Zarate YA	J Child Neurol	2014	2013-07-24			10.1177/0883073813492384
23613113	incluso	A boy with Burkitt lymphoma associated with Noonan syndrome due to a mutation in RAF1	Cianci P, Tono V, Sala A, Locatelli L, Carta C, Rizzari C, Biondi A, Selicorni A.	Am J Med Genet A. 2013 Jun;161A(6):1401-4. doi: 10.1002/ajmg.a.35875. Epub 2013 Apr 23.	Cianci P	Am J Med Genet A	2013	2013-04-25			10.1002/ajmg.a.35875
23321623	incluso	Prenatal diagnostic testing of the Noonan syndrome genes in fetuses with abnormal ultrasound findings	Croonen EA, Nillesen WM, Stuurman KE, Oudesluijs G, van de Laar IM, Martens L, Ockeloen C, Mathijssen IB, Schepens M, Ruiterkamp-Versteeg M, Scheffer H, Faas BH, van der Burgt I, Yntema HG.	Eur J Hum Genet. 2013 Sep;21(9):936-42. doi: 10.1038/ejhg.2012.285. Epub 2013 Jan 16.	Croonen EA	Eur J Hum Genet	2013	2013-01-17	PMC3746261		10.1038/ejhg.2012.285
22821648	incluso	Prenatal diagnosis of hypoplastic left heart syndrome associated with Noonan Syndrome and de novo RAF1 mutation	Schulz S, Fröber R, Kraus C, Schneider U.	Prenat Diagn. 2012 Oct;32(10):1016-8. doi: 10.1002/pd.3938. Epub 2012 Jul 23.	Schulz S	Prenat Diagn	2012	2012-07-24			10.1002/pd.3938
22781091	incluso	Atrioventricular canal defect in patients with RASopathies	Digilio MC, Romana Lepri F, Dentici ML, Henderson A, Baban A, Roberti MC, Capolino R, Versacci P, Surace C, Angioni A, Tartaglia M, Marino B, Dallapiccola B.	Eur J Hum Genet. 2013 Feb;21(2):200-4. doi: 10.1038/ejhg.2012.145. Epub 2012 Jul 11.	Digilio MC	Eur J Hum Genet	2013	2012-07-12	PMC3548264		10.1038/ejhg.2012.145
22465605	incluso	Alterations in RAS-MAPK genes in 200 Spanish patients with Noonan and other neuro-cardio-facio-cutaneous syndromes. Genotype and cardiopathy	Ezquieta B, Santomé JL, Carcavilla A, Guillén-Navarro E, Pérez-Aytés A, Sánchez del Pozo J, García-Miñaur S, Castillo E, Alonso M, Vendrell T, Santana A, Maroto E, Galbis L.	Rev Esp Cardiol (Engl Ed). 2012 May;65(5):447-55. doi: 10.1016/j.recesp.2011.12.016. Epub 2012 Mar 31.	Ezquieta B	Rev Esp Cardiol (Engl Ed)	2012	2012-04-03			10.1016/j.recesp.2011.12.016
21784453	incluso	Spectrum of mutations in Noonan syndrome and their correlation with phenotypes	Lee BH, Kim JM, Jin HY, Kim GH, Choi JH, Yoo HW.	J Pediatr. 2011 Dec;159(6):1029-35. doi: 10.1016/j.jpeds.2011.05.024. Epub 2011 Jul 23.	Lee BH	J Pediatr	2011	2011-07-26			10.1016/j.jpeds.2011.05.024
20052757	incluso	Molecular and clinical analysis of RAF1 in Noonan syndrome and related disorders: dephosphorylation of serine 259 as the essential mechanism for mutant activation	Kobayashi T, Aoki Y, Niihori T, Cavé H, Verloes A, Okamoto N, Kawame H, Fujiwara I, Takada F, Ohata T, Sakazume S, Ando T, Nakagawa N, Lapunzina P, Meneses AG, Gillessen-Kaesbach G, Wieczorek D, Kurosawa K, Mizuno S, Ohashi H, David A, Philip N, Guliyeva A, Narumi Y, Kure S, Tsuchiya S, Matsubara Y.	Hum Mutat. 2010 Mar;31(3):284-94. doi: 10.1002/humu.21187.	Kobayashi T	Hum Mutat	2010	2010-01-07			10.1002/humu.21187
19953625	incluso	Tumor spectrum in children with Noonan syndrome and SOS1 or RAF1 mutations	Denayer E, Devriendt K, de Ravel T, Van Buggenhout G, Smeets E, Francois I, Sznajer Y, Craen M, Leventopoulos G, Mutesa L, Vandecasseye W, Massa G, Kayserili H, Sciot R, Fryns JP, Legius E.	Genes Chromosomes Cancer. 2010 Mar;49(3):242-52. doi: 10.1002/gcc.20735.	Denayer E	Genes Chromosomes Cancer	2010	2009-12-03			10.1002/gcc.20735
19020799	incluso	PTPN11, SOS1, KRAS, and RAF1 gene analysis, and genotype-phenotype correlation in Korean patients with Noonan syndrome	Ko JM, Kim JM, Kim GH, Yoo HW.	J Hum Genet. 2008;53(11-12):999-1006. doi: 10.1007/s10038-008-0343-6. Epub 2008 Nov 20.	Ko JM	J Hum Genet	2008	2008-11-21			10.1007/s10038-008-0343-6
17603483	incluso	Gain-of-function RAF1 mutations cause Noonan and LEOPARD syndromes with hypertrophic cardiomyopathy	Pandit B, Sarkozy A, Pennacchio LA, Carta C, Oishi K, Martinelli S, Pogna EA, Schackwitz W, Ustaszewska A, Landstrom A, Bos JM, Ommen SR, Esposito G, Lepri F, Faul C, Mundel P, López Siguero JP, Tenconi R, Selicorni A, Rossi C, Mazzanti L, Torrente I, Marino B, Digilio MC, Zampino G, Ackerman MJ, Dallapiccola B, Tartaglia M, Gelb BD.	Nat Genet. 2007 Aug;39(8):1007-12. doi: 10.1038/ng2073. Epub 2007 Jul 1.	Pandit B	Nat Genet	2007	2007-07-03			10.1038/ng2073
17603482	incluso	Germline gain-of-function mutations in RAF1 cause Noonan syndrome	Razzaque MA, Nishizawa T, Komoike Y, Yagi H, Furutani M, Amo R, Kamisago M, Momma K, Katayama H, Nakagawa M, Fujiwara Y, Matsushima M, Mizuno K, Tokuyama M, Hirota H, Muneuchi J, Higashinakagawa T, Matsuoka R.	Nat Genet. 2007 Aug;39(8):1013-7. doi: 10.1038/ng2078. Epub 2007 Jul 1.	Razzaque MA	Nat Genet	2007	2007-07-03			10.1038/ng2078
27631234	incluso	Approaching the facts between genetic mutation and clinical practice of hypertrophic cardiomyopathy: A case report with RAF1 770C>T mutant
30384889	incluso	Genetic Basis of Severe Childhood-Onset Cardiomyopathies
